# Supplementary material for: The Improvement of Air Quality and Associated Mortality during the COVID-19 Lockdown in One Megacity of China: An Empirical Strategy
Source: MDPI journal article supplement (doi:10.3390/ijerph18168702), 2021-08-18
Supplement: s1 [file s1]

## Supplementary Material

**Title: The improvement of air quality and associated mortality during the COVID-19 lockdown in one megacity of China: an empirical strategy**

**Table S1.** Number of deaths due to NO<sub>2</sub> change during the lockdown based two references.

| NO <sub>2</sub> (per 10 ug/m3) | Li et al, 2021 [1]   | Total Deaths (17 days) | Chen et al, 2018 [2] | Total Deaths (17 days) |
|--------------------------------|----------------------|------------------------|----------------------|------------------------|
| All-cause mortality            | 0.65% (0.50%, 0.80%) | 14.63(11.25,18.00)     | 0.9% (0.7%, 1.1%)    | 20.25(15.75, 24.76)    |
| CVD mortality                  | 0.60% (0.41%, 0.79%) | 5.93(4.05, 7.80)       | 0.9% (0.7%, 1.2%)    | 8.89(6.92,11.85)       |
| Respiratory mortality          | 0.73% (0.46%, 1.00%) | 2.00(1.26,2.74)        | 1.2% (0.9%, 1.5%)    | 3.28(2.46, 4.10)       |

Reference:

1. Li, J.; Zhang, X.; Li, G.; Wang, L.; Yin, P.; Zhou, M., Short-term effects of ambient nitrogen dioxide on years of life lost in 48 major Chinese cities, 2013-2017. Chemosphere 2021, 263, 127887.
2. Renjie; Chen; Peng; Yin; Xia; Meng; Lijun; Wang; Cong; Liu, Associations between ambient nitrogen dioxide and daily cause-specific mortality: Evidence from 272 Chinese cities. Epidemiology (Cambridge, Mass.) 2018.
